# Supplementary material for: Sequential extraction of hemicelluloses by subcritical water improves saccharification of hybrid aspen wood grown in greenhouse and field conditions
Source: Royal Society of Chemistry journal article supplement (doi:10.1039/d3gc01020a), 2023-01-01
Supplement: d3gc01020a1.pdf [file d3gc01020a1.pdf]

## Supplementary Material

### **Sequential extraction of hemicelluloses by subcritical water improves saccharification of hybrid aspen wood grown in greenhouse and field conditions**

Pramod Sivan<sup>‡a</sup>, Emilia Heinonen<sup>‡a,b</sup>, Madhavi Latha Gandla<sup>c</sup>, Amparo Jiménez-Quero<sup>a</sup>,  
Hüsamettin Deniz Özeren<sup>a</sup>, Leif J. Jönsson<sup>c</sup>, Ewa J Mellerowicz<sup>d</sup> and Francisco Vilaplana<sup>a,b\*</sup>

<sup>a</sup> Division of Glycoscience, Department of Chemistry, KTH Royal Institute of Technology, AlbaNova University Centre, 106 91 Stockholm, Sweden

<sup>b</sup> Wallenberg Wood Science Centre, KTH Royal Institute of Technology, 100 44 Stockholm, Sweden

<sup>c</sup> Department of Chemistry, Umeå University, 901 87 Umeå, Sweden

<sup>d</sup> Umeå Plant Science Centre, Swedish University of Agricultural Sciences, Department of Forest Genetics and Plant Physiology, 901 83 Umeå, Sweden

<sup>‡</sup>These authors contributed equally to this work.

\*Corresponding author: Francisco Vilaplana ([franvila@kth.se](mailto:franvila@kth.se))

**Figure S1.** Chromatograms from the multiple-detector SEC: profiles from refractive index (orange), UV (blue) and MALLS detectors (grey). GHA = greenhouse, FA = Field

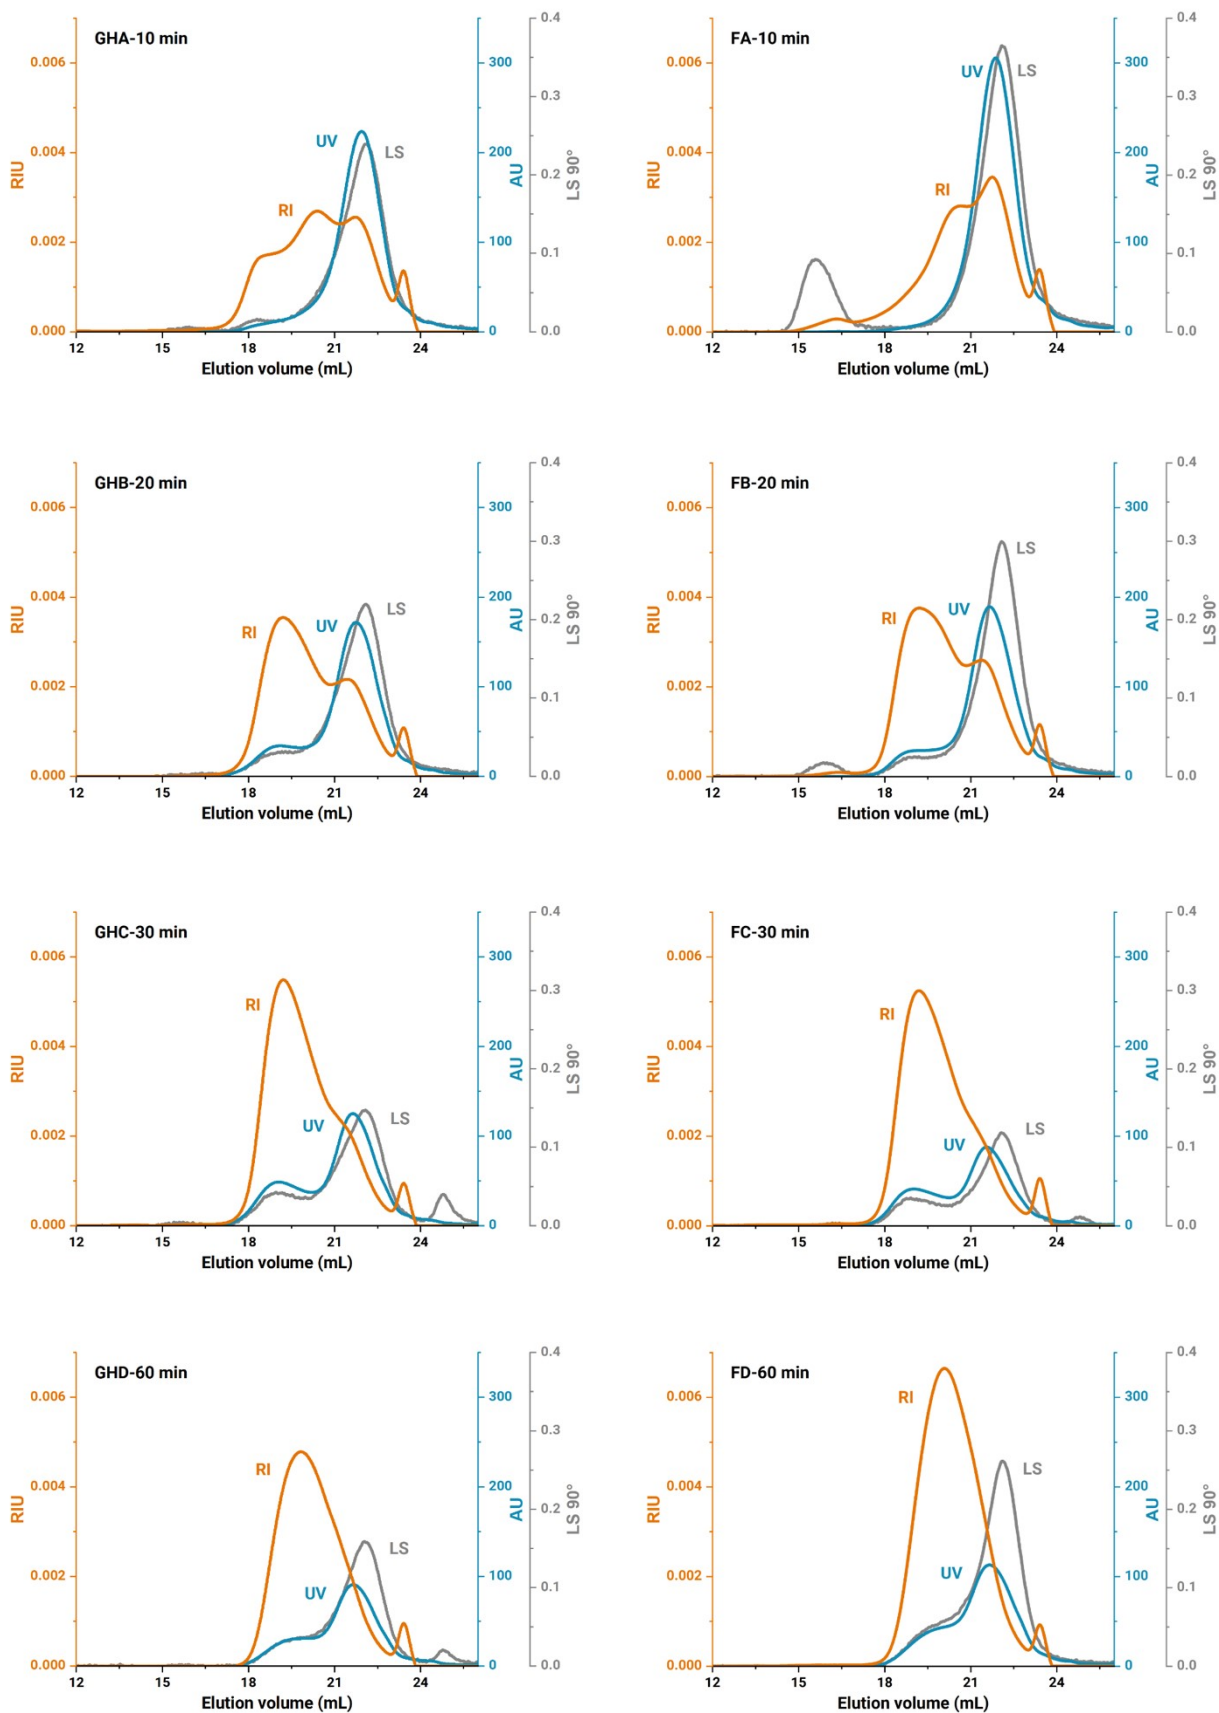

**Table S1.** Monosaccharide composition of raw material, extracts and residue from greenhouse grown aspen

| <b>Composition<br/>(mg per gm)</b> | <b>Starting<br/>material</b> | <b>A1</b>    | <b>A2</b>    | <b>A3</b>    | <b>A4</b>    | <b>Residue</b> |
|------------------------------------|------------------------------|--------------|--------------|--------------|--------------|----------------|
| Ara                                | 2,9                          | 31,4         | 10,7         | 4,3          | 2,2          | 0,4            |
| Rha                                | 4,6                          | 42,3         | 26,6         | 18,6         | 13,2         | 1,1            |
| Gal                                | 10,2                         | 107,5        | 31,1         | 18,6         | 15,5         | 2,7            |
| Glc                                | 441,1                        | 79,6         | 24,2         | 7,3          | 3,3          | 564,0          |
| Xyl                                | 228,2                        | 175,9        | 408,9        | 568,0        | 600,1        | 164,9          |
| Man                                | 28,3                         | 118,3        | 45,8         | 16,4         | 5,8          | 21,7           |
| GalA                               | 4,4                          | 159,5        | 64,2         | 27,7         | 20,2         | 1,8            |
| GlcA                               | 1,4                          | 15,6         | 8,2          | 7,5          | 6,9          | 0,8            |
| MeGlcA                             | n.d                          | 56,0         | 75,4         | 112,5        | 127,3        | n.d            |
| <b>Total</b>                       | <b>721,2</b>                 | <b>786,1</b> | <b>695,0</b> | <b>781,0</b> | <b>794,4</b> | <b>757,4</b>   |

**Table S2.** Monosaccharide composition of raw material, extracts and residue from field grown aspen

| <b>Composition<br/>(mg per gm)</b> | <b>Starting<br/>material</b> | <b>A1</b>    | <b>A2</b>    | <b>A3</b>    | <b>A4</b>    | <b>Residue</b> |
|------------------------------------|------------------------------|--------------|--------------|--------------|--------------|----------------|
| Ara                                | 4,3                          | 47,6         | 15,6         | 5,1          | 3,9          | 0,6            |
| Rha                                | 4,4                          | 33,7         | 20,0         | 15,5         | 12,8         | 0,9            |
| Gal                                | 6,7                          | 38,6         | 17,3         | 12,7         | 16,7         | 3,0            |
| Glc                                | 461,5                        | 168,2        | 32,2         | 7,6          | 8,0          | 579,0          |
| Xyl                                | 247,7                        | 183,0        | 484,4        | 622,5        | 692,0        | 168,2          |
| Man                                | 22,1                         | 133,6        | 36,5         | 11,4         | 7,3          | 16,8           |
| GalA                               | 4,3                          | 136,1        | 50,5         | 25,9         | 21,7         | 1,6            |
| GlcA                               | 0,8                          | 6,2          | 4,3          | 4,4          | 4,7          | 0,5            |
| MeGlcA                             | n.d                          | 57,3         | 95,1         | 132,8        | 167,3        | n.d            |
| <b>Total</b>                       | <b>751,8</b>                 | <b>804,3</b> | <b>755,9</b> | <b>838,0</b> | <b>934,4</b> | <b>770,6</b>   |

**Table S3.** P- values of monosaccharide composition of wood from green house (G) and field (F) grown aspen

|            | G          | F          | p-Value  |
|------------|------------|------------|----------|
| Pectin (%) | 3.27±0.02  | 2.73±0.02  | <0.0001* |
| Mannan (%) | 3.94±0.40  | 2.95±0.40  | 0.0001*  |
| Xylan (%)  | 31.00±0.30 | 32.40±0.30 | 0.0511   |

**Table S4.** P- values of MeGlcA to Xyl ratio of sequential subcritical extracts from green house (G) and field (F) grown aspen

|           | G       | F       |
|-----------|---------|---------|
| 10-20 min | 0.0036* | 0.0040* |
| 20-30 min | 0.1811  | 0.0515  |
| 30-60 min | 0.0079* | 0.0394* |

**Table S5.** P- values of lignin monomer and S/G ratio of sequential subcritical extracts from greenhouse (G) and field (F) grown aspen

| Greenhouse (G) | S        | G        | H        | S/G      |
|----------------|----------|----------|----------|----------|
| 10-20 min      | 0.0004*  | 0.3364   | 0.0026*  | <0.0001* |
| 20-30 min      | 0.1744   | 0.0217*  | 0.0017*  | 0.0006*  |
| 30-60 min      | 0.0040*  | 0.0006*  | <0.0001* | <0.0001* |
| Field (F)      | S        | G        | H        | S/G      |
| 10-20 min      | 0.0074*  | <0.0001* | <0.0001* | <0.0001* |
| 20-30 min      | <0.0001* | <0.0001* | <0.0001* | <0.0001* |
| 30-60 min      | <0.0002* | <0.0001* | <0.0001* | <0.0001* |

**Table S6.** P- values of cellulose microfibril width of wood (SM) and SWE residue (R) from green house (G) and field (F) grown aspen

|   | SM        | R          | p-Value  |          |
|---|-----------|------------|----------|----------|
|   |           |            | SM vs R  | G vs F   |
| G | 14.0±0.48 | 12.00±0.08 | 0.0237*  | <0.0001* |
| F | 17.0±0.24 | 15.07±0.60 | <0.0001* |          |



**Table S7.** P- values of BET surface area of wood (SM) and SWE residue (R) from green house (G) and field (F) grown aspen

|   | SM        | R         | p-Value |
|---|-----------|-----------|---------|
| G | 2.20±0.08 | 3.07±0.08 | 0.0004* |
| F | 1.40±0.06 | 1.98±0.60 | 0.0017* |

**Table S8.** P- values of relative crystallinity index of wood (SM) and SWE residue (R) from green house (G) and field (F) grown aspen

|   | SM         | R          | p-Value   |
|---|------------|------------|-----------|
| G | 42.80±0.11 | 48.60±0.11 | <0.0001*  |
| F | 43.70±0.05 | 50.20±0.60 | <0.0001** |

**Table S9:** Composition sugars released during saccharification from wood (SM) and residue of sub-critical extraction process from filed grown aspen

|           | NT          | SW          | PL(AP)      | AP          | PL(SW/AP)   | SW/AP       |
|-----------|-------------|-------------|-------------|-------------|-------------|-------------|
| Arabinose | 0.001±0.000 | 0.000±0.000 | 0.003±0.000 | 0.000±0.000 | 0.001±0.000 | 0.000±0.000 |
| Galactose | 0.001±0.000 | 0.001±0.000 | 0.005±0.002 | 0.000±0.000 | 0.003±0.000 | 0.000±0.000 |
| Glucose   | 0.052±0.002 | 0.312±0.023 | 0.057±0.014 | 0.403±0.020 | 0.069±0.018 | 0.002±0.024 |
| Xylose    | 0.010±0.000 | 0.091±0.007 | 0.100±0.028 | 0.005±0.002 | 0.102±0.011 | 0.000±0.002 |
| Mannose   | 0.003±0.000 | 0.005±0.000 | 0.012±0.005 | 0.004±0.000 | 0.011±0.001 | 0.000±0.000 |
| Total     | 0.068±0.002 | 0.409±0.030 | 0.178±0.050 | 0.412±0.022 | 0.186±0.030 | 0.603±0.027 |

**Table S10.** Composition sugars released during saccharification from wood (SM) and residue of sub-critical extraction process from greenhouse grown aspen

|           | NT          | SW          | PL(AP)      | AP          | PL(SW/AP)   | SW/AP       |
|-----------|-------------|-------------|-------------|-------------|-------------|-------------|
| Arabinose | 0.001±0.000 | 0.000±0.000 | 0.003±0.000 | 0.000±0.000 | 0.001±0.000 | 0.000±0.000 |
| Galactose | 0.001±0.000 | 0.001±0.000 | 0.008±0.002 | 0.000±0.000 | 0.003±0.000 | 0.000±0.000 |
| Glucose   | 0.080±0.001 | 0.291±0.010 | 0.069±0.008 | 0.409±0.036 | 0.056±0.011 | 0.552±0.019 |
| Xylose    | 0.014±0.000 | 0.086±0.004 | 0.137±0.000 | 0.005±0.001 | 0.104±0.008 | 0.011±0.002 |
| Mannose   | 0.004±0.000 | 0.006±0.000 | 0.018±0.005 | 0.003±0.000 | 0.014±0.001 | 0.004±0.000 |
| Total     | 0.101±0.001 | 0.384±0.014 | 0.235±0.015 | 0.417±0.036 | 0.178±0.020 | 0.567±0.022 |

**Table S11.** P- values of glucose production rate from saccharification of wood (SM) and SWE residue (R) from green house (G) and field (F) grown aspen

|      | SM        | R         | p-Value  |
|------|-----------|-----------|----------|
| G-NT | 0.77±0.07 | 1.14±0.13 | <0.0001* |
| G-AP | 2.36±0.11 | 2.60±0.50 | 0.0054*  |
| F-NT | 0.31±0.04 | 0.92±0.09 | <0.0001* |
| F-AP | 2.35±0.40 | 2.35±0.12 | 0.6556   |

\*NT= Non-treated; AP=Acid pretreated

**Table S12.** P-values from the comparison of glucose production rate (GPR) , yields of glucose (Glc), xylose (Xyl) and total sugar from saccharification of field grown aspen wood after sub-critical extraction (SW) process with those of different treatments. NT= Non-treated, AP= Acid-Pretreated.

| Treatment | GPR    | Glc    | Xyl    | Total sugar |
|-----------|--------|--------|--------|-------------|
| NT        | <,0001 | <,0001 | <,0001 | <,0001      |
| AP        | <,0001 | <,0001 | 0.1979 | <,0001      |
| SW/AP     | <,0001 | <,0001 | 0,0016 | <,0001      |

**Table S13.** P-values from the comparison of glucose production rate (GPR), yields of glucose (Glc), xylose (Xyl) and total sugar from saccharification of green house grown aspen wood after sub-critical extraction (SWE) process with those of different treatments. NT= Non-treated, AP= Acid-Pretreated,

| Treatment | GPR    | Glc    | Xyl    | Total sugar |
|-----------|--------|--------|--------|-------------|
| NT        | <,0001 | <,0001 | <,0001 | <,0001      |
| AP        | <,0001 | <,0001 | <,0001 | <,0001      |
| SW/AP     | <,0001 | <,0001 | <,0001 | <,0001      |

**Table S14.** Evolution of the pH of the extracts and the blank (buffer passed through cells without sample under same experimental conditions). G1, G2, G3 and G4 (technical replicates of greenhouse grown aspen samples); F1, F2, F3 and F4 (technical replicates of field grown aspen samples).

|    | Blank | 10 min | 20 min | 30 min | 60 min |
|----|-------|--------|--------|--------|--------|
| G1 | 5,01  | 4,90   | 4,87   | 4,85   | 4,82   |
| G2 | 5,01  | 4,91   | 4,88   | 4,87   | 4,83   |
| G3 | 5,01  | 4,92   | 4,88   | 4,87   | 4,82   |
| G4 | 5,00  | 4,91   | 4,87   | 4,85   | 4,80   |
| F1 | 5,01  | 4,86   | 4,87   | 4,85   | 4,81   |
| F2 | 5,03  | 4,84   | 4,88   | 4,85   | 4,82   |
| F3 | 5,00  | 4,81   | 4,85   | 4,82   | 4,79   |
| F4 | 5,01  | 4,81   | 4,83   | 4,80   | 4,79   |
